# Supplementary material for: Effect of thermal ageing on the structure and catalytic activity of Pd/CeO2 prepared using arc-plasma process
Source: Royal Society of Chemistry journal article supplement (doi:10.1039/c4cy00291a), 2014-01-01
Supplement: c4cy00291a1.pdf [file c4cy00291a1.pdf]

Supplementary information

Table S1 The features of CeO<sub>2</sub> powders before and after ageing at 900 °C

| ageing                           | crystalline structure | S <sub>BET</sub> / m <sup>2</sup> ·g <sup>-1</sup> | primary particle size <sup>a</sup> / nm | Ce <sup>3+</sup> /Ce <sup>4+</sup> <sup>b</sup> / % | T <sub>50</sub> / °C |
|----------------------------------|-----------------------|----------------------------------------------------|-----------------------------------------|-----------------------------------------------------|----------------------|
| none                             | fluorite              | 173                                                | 1~3                                     | 31                                                  | >600                 |
| 900 °C, 10% H <sub>2</sub> O/air | fluorite              | 6                                                  | >100                                    | 33                                                  | >600                 |

<sup>a</sup> Determined by TEM images.

<sup>b</sup> Determined by Ce3d XPS spectra.

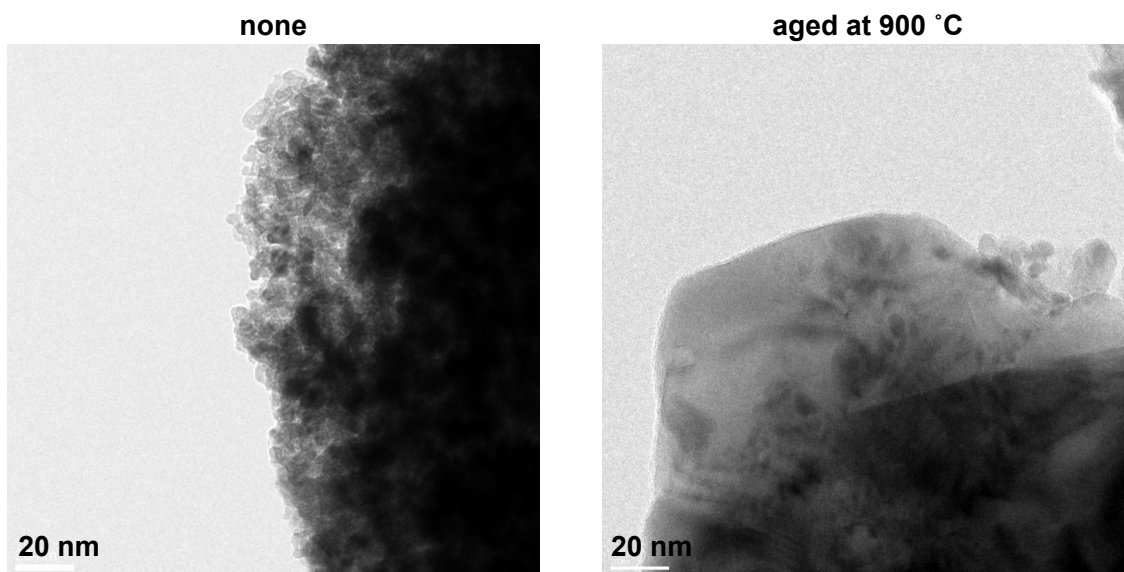

Figure S1 TEM images of CeO<sub>2</sub> powders before and after ageing at 900 °C.

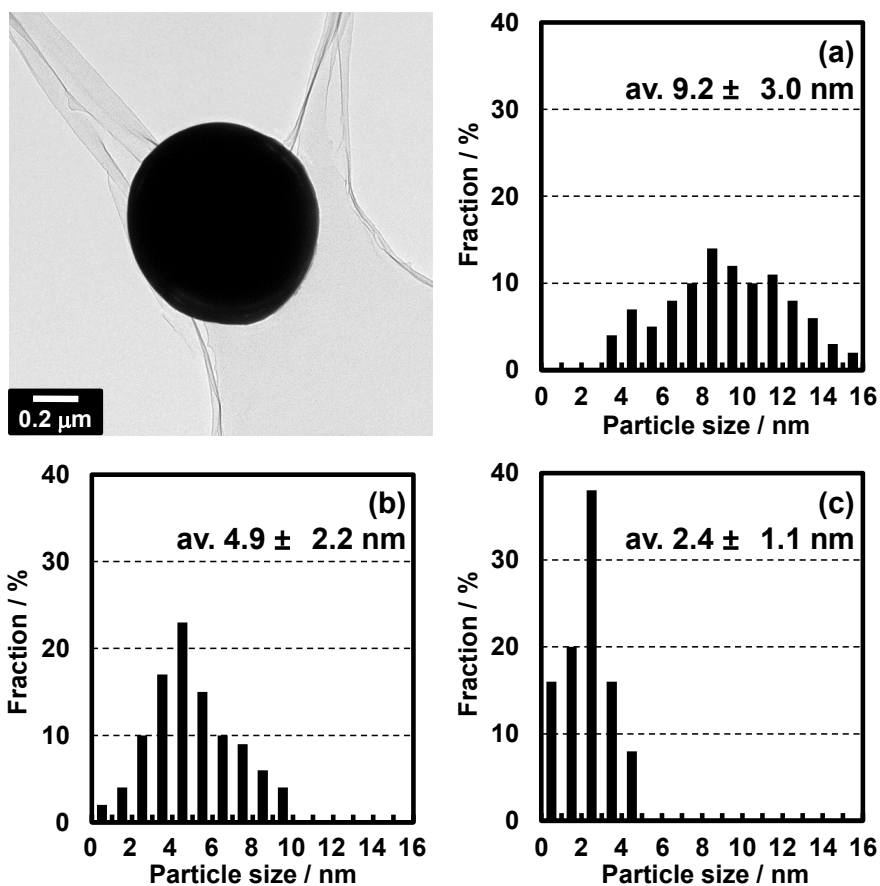

Figure S2 Size distributions and average sizes of Rh metal nanoparticles prepared by using arc-plasma process with input energies of (a) 29 J, (b) 6 J and (c) 3 J.

The size of metal nanoparticles increased with an increase of input energy. As shown in TEM image, large metal droplets were also deposited at the highest input energy (29 J).

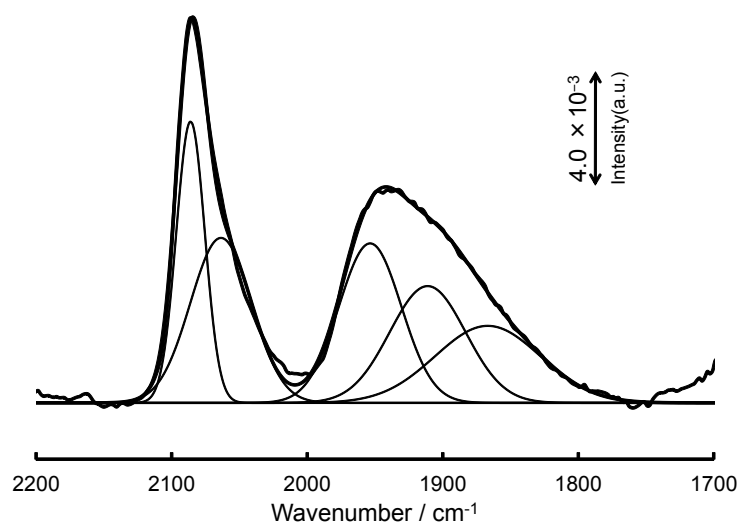

Figure S3 in situ FT-IR of CO adsorbed on Pd/CeO<sub>2</sub> (AP1) at 50 °C.

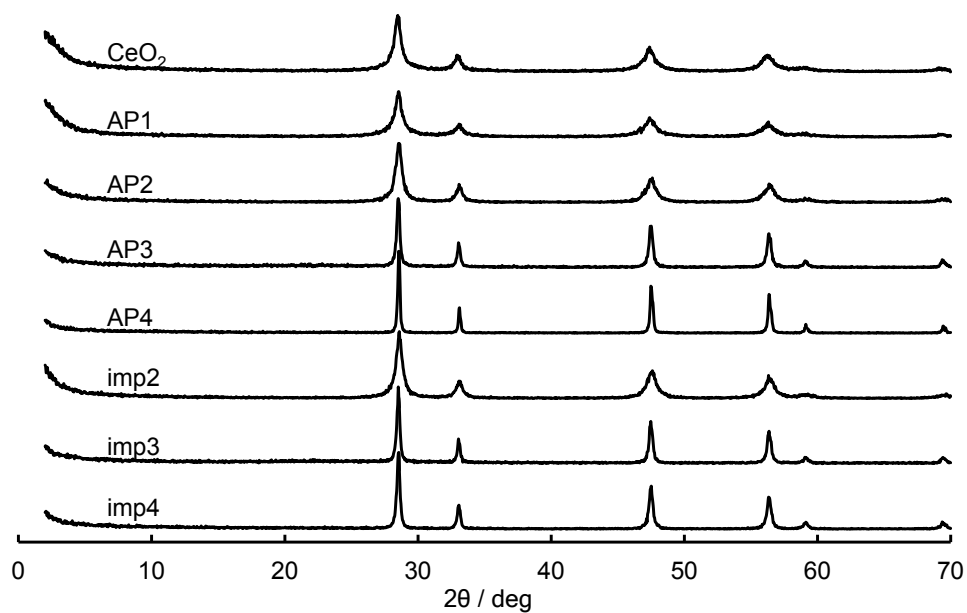

Figure S4 XRD patterns of CeO<sub>2</sub> and Pd/CeO<sub>2</sub>(AP1~AP4 and imp1~imp3) before and after thermal ageing.
